# Supplementary material for: Overexpression of Karrikins Receptor Gene Sapium sebiferum KAI2 Promotes the Cold Stress Tolerance via Regulating the Redox Homeostasis in Arabidopsis thaliana
Source: PubMed Central journal article supplement (PMC8320022; doi:10.3389/fpls.2021.657960), 2021-07-15
Supplement: Image_1.pdf [file Image_1.pdf]

**A**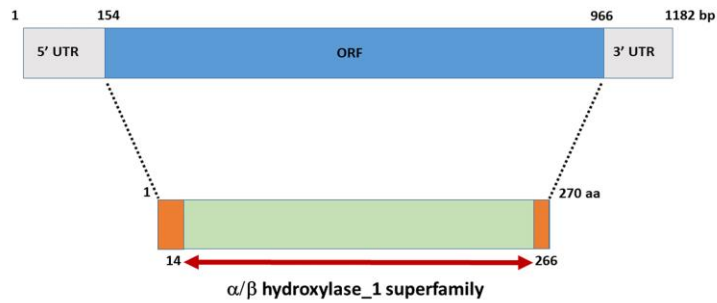**B**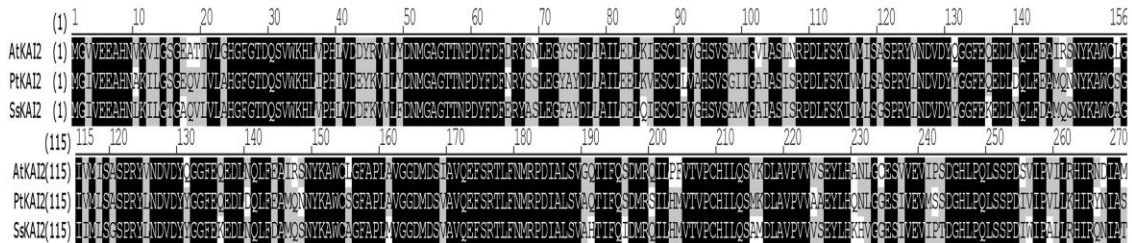

### Bio-informatics analysis of *SsKAI2*.

**A**, Schematic representation of *Sapium sebiferum KAI2*. The *SsKAI2* gene is 1,182 bp with a 153-bp 5' untranslated region, a 813-bp coding region, a 216-bp 3' untranslated region, and no introns. *SsKAI2* translated to make 270 amino acid proteins, which has  $\alpha/\beta$  hydroxylase domain. **B**, *Sapium sebiferum KAI2* protein alignment with *Arabidopsis* and *Populus KAI2* protein. The black background indicates similar and grey background shows a conserved sequence.
